# Supplementary material
Source: ML conference proceedings conference paper supplement (https://proceedings.neurips.cc/paper_files/paper/2016/hash/2596a54cdbb555cfd09cd5d991da0f55-Abstract.html)
Supplement: Supplementary file [file 2596a54cdbb555cfd09cd5d991da0f55-Supplemental.zip]

## A Proofs

### A.1 Proof of (12)

Consider the subspace parametrization for the density  $q(f) = \mathcal{N}(f|\tilde{\mu}, \tilde{\Sigma})$  of  $f \in \mathcal{H}$  with

$$\begin{aligned}\tilde{\mu} &= \Psi_{\tilde{X}} K_{\tilde{X}}^{-1} \tilde{m} \\ \tilde{\Sigma} &= I + \Psi_{\tilde{X}} (K_{\tilde{X}}^{-1} \tilde{S} K_{\tilde{X}}^{-1} - K_{\tilde{X}}^{-1}) \Psi_{\tilde{X}}^T.\end{aligned}$$

Decompose  $f = f_{\parallel} + f_{\perp}$ , where  $f_{\parallel} = \Psi_{\tilde{X}} K_{\tilde{X}}^{-1} f_{\tilde{X}}$  and  $f_{\perp}$  satisfies  $N_{\tilde{X}} f_{\perp} = f_{\perp}$ , with respect to the null-space projection  $N_{\tilde{X}} = I - P_{\tilde{X}}$ , where  $P_{\tilde{X}} = \Psi_{\tilde{X}} K_{\tilde{X}}^{-1} \Psi_{\tilde{X}}^T$ . Further, consider  $b$  satisfying  $f_{\perp} = \Phi_X b$ , which implies  $\Phi_X^T P_{\tilde{X}} \Phi_X b = \hat{K}_X b = 0$ . That is,  $b = \hat{N} b$ , where  $\hat{N}$  is the null space of  $\hat{K}_X$ . By construction, since

$$\begin{aligned}f_X - K_{X, \tilde{X}} K_{\tilde{X}}^{-1} f_{\tilde{X}} &= \Phi_X^T (I - \Psi_{\tilde{X}} K_{\tilde{X}}^{-1} \Psi_{\tilde{X}}^T) f \\ &= \Phi_X^T f_{\perp} = \Phi_X^T N_{\tilde{X}} \Phi_X \hat{N} b \\ &= (K_X - \hat{K}_X) \hat{N} b\end{aligned}$$

it follows that

$$\begin{aligned}-\log q(f) &= \frac{1}{2} \log |\tilde{\Sigma}| + \frac{1}{2} (f - \tilde{\mu})^T \tilde{\Sigma}^{-1} (f - \tilde{\mu}) + \text{const.} \\ &= \frac{1}{2} \log \frac{|\tilde{S}|}{|K_{\tilde{X}}|} + \frac{1}{2} (f - \tilde{\mu})^T (I - \Psi_{\tilde{X}} (K_{\tilde{X}}^{-1} - \tilde{S}^{-1}) \Psi_{\tilde{X}}^T) (f - \tilde{\mu}) + \text{const.} \\ &= \frac{1}{2} \log \frac{|\tilde{S}|}{|K_{\tilde{X}}|} + \frac{1}{2} (f - \tilde{\mu})^T (N_{\tilde{X}} + \Psi_{\tilde{X}} \tilde{S}^{-1} \Psi_{\tilde{X}}^T) (f - \tilde{\mu}) + \text{const.} \\ &= \frac{1}{2} \log \frac{|\tilde{S}|}{|K_{\tilde{X}}|} + \frac{1}{2} f_{\perp}^T N_{\tilde{X}} f_{\perp} + \frac{1}{2} (f_{\tilde{X}} - \tilde{m})^T K_{\tilde{X}}^{-1} \Psi_{\tilde{X}}^T \Psi_{\tilde{X}} \tilde{S}^{-1} \Psi_{\tilde{X}}^T \Psi_{\tilde{X}} K_{\tilde{X}}^{-1} (f_{\tilde{X}} - \tilde{m}) + \text{const.} \\ &= \frac{1}{2} \log \frac{|\tilde{S}|}{|K_{\tilde{X}}|} + \frac{1}{2} b^T \hat{N} (K_X - \hat{K}_X) \hat{N} b + \frac{1}{2} (f_{\tilde{X}} - \tilde{m})^T \tilde{S}^{-1} (f_{\tilde{X}} - \tilde{m}) + \text{const.} \\ &= \frac{1}{2} \log \frac{|\tilde{S}|}{|K_{\tilde{X}}|} + \frac{1}{2} (f_X - K_{X, \tilde{X}} K_{\tilde{X}}^{-1} f_{\tilde{X}})^T (K_X - \hat{K}_X)^+ (f_X - K_{X, \tilde{X}} K_{\tilde{X}}^{-1} f_{\tilde{X}}) \\ &\quad + \frac{1}{2} (f_{\tilde{X}} - \tilde{m})^T \tilde{S}^{-1} (f_{\tilde{X}} - \tilde{m}) + \text{const.} \\ &= \frac{1}{2} \log \frac{1}{|K_{\tilde{X}}| |K_X - \hat{K}_X|} - \log p(f_X | f_{\tilde{X}}) - \log q(f_{\tilde{X}}) + \text{const.}\end{aligned}$$

where we used the identities

$$\begin{aligned}|\tilde{\Sigma}| &= |I| |(\tilde{S} - K_{\tilde{X}})^{-1} + K_{\tilde{X}}^{-1}| |\tilde{S} - K_{\tilde{X}}| \\ &= |(K_{\tilde{X}} - K_{\tilde{X}} \tilde{S}^{-1} K_{\tilde{X}})^{-1}| |\tilde{S} - K_{\tilde{X}}| \\ &= \frac{|\tilde{S} - K_{\tilde{X}}|}{|K_{\tilde{X}} - K_{\tilde{X}} \tilde{S}^{-1} K_{\tilde{X}}|} \\ &= \frac{|\tilde{S} - K_{\tilde{X}}|}{|K_{\tilde{X}} \tilde{S}^{-1}| |\tilde{S} - K_{\tilde{X}}|} \\ &= \frac{|\tilde{S}|}{|K_{\tilde{X}}|}\end{aligned}$$

and

$$\begin{aligned}
\tilde{\Sigma}^{-1} &= \left( I + \Psi_{\tilde{X}} K_{\tilde{X}}^{-1} (\tilde{S} - K_{\tilde{X}}) K_{\tilde{X}}^{-1} \Psi_{\tilde{X}}^T \right)^{-1} \\
&= (I - \Psi_{\tilde{X}} K_{\tilde{X}}^{-1} \left( (\tilde{S} - K_{\tilde{X}})^{-1} + K_{\tilde{X}}^{-1} \right)^{-1} K_{\tilde{X}}^{-1} \Psi_{\tilde{X}}^T) \\
&= (I - \Psi_{\tilde{X}} K_{\tilde{X}}^{-1} \left( K_{\tilde{X}} - K_{\tilde{X}} (K_{\tilde{X}} + \tilde{S} - K_{\tilde{X}})^{-1} K_{\tilde{X}} \right) K_{\tilde{X}}^{-1} \Psi_{\tilde{X}}^T) \\
&= I - \Psi_{\tilde{X}} \left( K_{\tilde{X}}^{-1} - \tilde{S}^{-1} \right) \Psi_{\tilde{X}}^T.
\end{aligned}$$

Thus

$$q(f) \propto p(f_X | f_{\tilde{X}}) q(f_{\tilde{X}}) |K_{\tilde{X}}|^{1/2} |K_X - \hat{K}_X|^{1/2}$$

## A.2 Proof of the equivalence between (7) and (13)

Using (12), since

$$f_{\parallel}^T f_{\parallel} = f_{\tilde{X}}^T K_{\tilde{X}}^{-1} f_{\tilde{X}}$$

and

$$f_{\perp}^T f_{\perp} = b \hat{N} \Phi_X^T N_{\tilde{X}} \Phi_X \hat{N} b = (f_X - K_{X,\tilde{X}} K_{\tilde{X}}^{-1} f_{\tilde{X}})^T (K_X - \hat{K}_X)^+ (f_X - K_{X,\tilde{X}} K_{\tilde{X}}^{-1} f_{\tilde{X}})$$

we can rewrite (13) as

$$\begin{aligned}
&\int q(f) \log \frac{p(y|f)p(f)}{q(f)} df \\
&\cong \int p(f_X | f_{\tilde{X}}) q(f_{\tilde{X}}) |K_{\tilde{X}}|^{1/2} |K_X - \hat{K}_X|^{1/2} \log \frac{p(y|f)p(f_X | f_{\tilde{X}})p(f_{\tilde{X}}) |K_{\tilde{X}}|^{1/2} |K_X - \hat{K}_X|^{1/2}}{p(f_X | f_{\tilde{X}})q(f_{\tilde{X}}) |K_{\tilde{X}}|^{1/2} |K_X - \hat{K}_X|^{1/2}} df \\
&= \int p(f_X | f_{\tilde{X}}) q(f_{\tilde{X}}) \log \frac{p(y|f)p(f_X | f_{\tilde{X}})p(f_{\tilde{X}})}{p(f_X | f_{\tilde{X}})q(f_{\tilde{X}})} |K_{\tilde{X}}|^{1/2} df_{\parallel} |K_X - \hat{K}_X|^{1/2} df_{\perp} \\
&= \int q(f_X, f_{\tilde{X}}) \log \frac{p(y|f_X)p(f_{\tilde{X}})}{q(f_X, f_{\tilde{X}})} df_X df_{\tilde{X}}
\end{aligned}$$

where  $\cong$  denotes the equivalence up to constants.

## A.3 Solution to subproblem (16)

Consider the objective function

$$\int q(f) \log \frac{p(y_t|f)^{N\gamma_t} p(f)^{\gamma_t} q_t(f)^{1-\gamma_t}}{q(f)} df$$

The modified likelihood term is

$$\log p(y_t|f)^{N\gamma_t} = \log \mathcal{N}(y_t | \phi_x^T f, \frac{\sigma^2}{N\gamma_t}) + \text{const.}$$

Suppose  $q_t$  has mean  $\tilde{\mu}_t$  and precision  $\tilde{\Sigma}_t^{-1}$ , where  $\tilde{\Sigma}$  is subspace parametrized  $\tilde{\Sigma}_t = I + \Psi_{\tilde{X}} A_t \Psi_{\tilde{X}}^T$  with  $A_t = \tilde{S}_t^{-1} - K_{\tilde{X}}^{-1}$ . Then  $\tilde{\Sigma}_t^{-1} = I - \Psi_{\tilde{X}} (A_t^{-1} + K_{\tilde{X}})^{-1} \Psi_{\tilde{X}}$ , and the natural parameters in the modified prior  $p(f)^{\gamma_t} q_t(f)^{1-\gamma_t} \propto \mathcal{N}(f | \hat{\mu}_t, \hat{\Sigma}_t)$  can be written as

$$\begin{aligned}
\hat{\Sigma}_t^{-1} \hat{\mu}_t &= \gamma_t \Sigma^{-1} \mu + (1 - \gamma_t) \tilde{\Sigma}_t^{-1} \mu_t = (1 - \gamma_t) \tilde{\Sigma}_t^{-1} \mu_t \\
\hat{\Sigma}_t^{-1} &= \gamma_t \Sigma^{-1} + (1 - \gamma_t) \tilde{\Sigma}_t^{-1} = I - (1 - \gamma_t) \Psi_{\tilde{X}} (A_t^{-1} + K_{\tilde{X}})^{-1} \Psi_{\tilde{X}}
\end{aligned}$$

In implementation, it means  $p(f)^{\gamma_t} q_t(f)^{1-\gamma_t} \propto p(f_X | f_{\tilde{X}}) q(f_{\tilde{X}} | \hat{m}, \hat{S})$ , where  $\hat{m}, \hat{S}$  can be identified as below:

$$\begin{aligned}
\hat{\Sigma}_t^{-1} &= I - (1 - \gamma_t) \Psi_{\tilde{X}} \left( K_{\tilde{X}}^{-1} - \tilde{S}_t^{-1} \right) \Psi_{\tilde{X}}^T \\
&= I - \Psi_{\tilde{X}} \left( K_{\tilde{X}}^{-1} - K_{\tilde{X}}^{-1} + (1 - \gamma_t) K_{\tilde{X}}^{-1} - (1 - \gamma_t) \tilde{S}_t^{-1} \right) \Psi_{\tilde{X}}^T \\
&= I - \Psi_{\tilde{X}} \left( K_{\tilde{X}}^{-1} - ((1 - \gamma_t) \tilde{S}_t^{-1} + \gamma_t K_{\tilde{X}}^{-1}) \right) \Psi_{\tilde{X}}^T \\
&= I - \Psi_{\tilde{X}} \left( K_{\tilde{X}}^{-1} - \hat{S}_t^{-1} \right) \Psi_{\tilde{X}}^T
\end{aligned}$$

where we define

$$\hat{S}_t^{-1} := (1 - \gamma_t) \tilde{S}_t^{-1} + \gamma_t K_{\tilde{X}}^{-1}$$

That is, subspace parametrization can be expressed with  $\hat{S}$

$$\hat{\Sigma}_t = I - \Psi_{\tilde{X}} K_{\tilde{X}}^{-1} \left( K_{\tilde{X}} - \hat{S}_t \right) K_{\tilde{X}}^{-1} \Psi_{\tilde{X}}^T$$

For the mean,

$$\begin{aligned}
\hat{\mu}_t &= \hat{\Sigma}_t \left( (1 - \gamma_t) \tilde{\Sigma}_t^{-1} \tilde{\mu} \right) \\
&= (1 - \gamma_t) \hat{\Sigma}_t \tilde{\Sigma}_t^{-1} \tilde{\mu} \\
&= (1 - \gamma_t) (I - \Psi_{\tilde{X}} K_{\tilde{X}}^{-1} (K_{\tilde{X}} - \hat{S}_t) K_{\tilde{X}}^{-1} \Psi_{\tilde{X}}^T) \Psi_{\tilde{X}} \tilde{S}_t^{-1} \tilde{m}_t \\
&= (1 - \gamma_t) \Psi_{\tilde{X}} (I - K_{\tilde{X}}^{-1} (K_{\tilde{X}} - \hat{S}_t)) \tilde{S}_t^{-1} \tilde{m}_t \\
&= (1 - \gamma_t) \Psi_{\tilde{X}} (I - (I - K_{\tilde{X}}^{-1} \hat{S}_t)) \tilde{S}_t^{-1} \tilde{m}_t \\
&= \Psi_{\tilde{X}} K_{\tilde{X}}^{-1} \left( (1 - \gamma_t) \hat{S}_t \tilde{S}_t^{-1} \tilde{m}_t \right) \\
&= \Psi_{\tilde{X}} K_{\tilde{X}}^{-1} \hat{m}_t
\end{aligned}$$

where  $\hat{m}_t := (1 - \gamma_t) \hat{S}_t \tilde{S}_t^{-1} \tilde{m}_t$

Thus, the subproblem is a also variational sparse GPR written in the same inducing functions, but with likelihood with modified variance

$$\sigma^2 \leftarrow \frac{\sigma^2}{N \gamma_t}$$

and prior with modified mean and covariance

$$\begin{aligned}
\hat{m}_t &\leftarrow (1 - \gamma_t) \hat{S}_t \tilde{S}_t^{-1} \tilde{m}_t \\
\hat{S}_t^{-1} &\leftarrow (1 - \gamma_t) \tilde{S}_t^{-1} + \gamma_t K_{\tilde{X}}^{-1}
\end{aligned}$$

## B Auxiliary Experimental Results

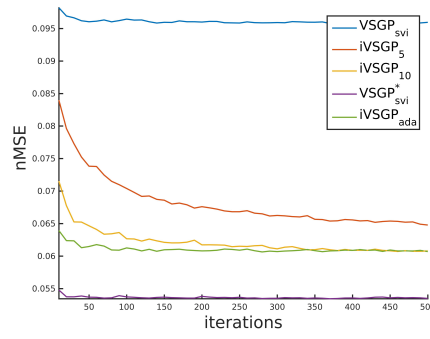

Figure 2: Online learning results of *kin40k*. nMSE evaluated on the held out test set;  $N_m = 2048$ .



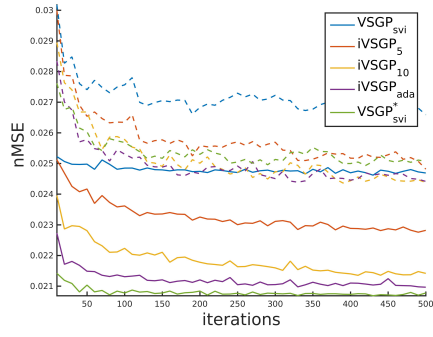

(a) joint 1

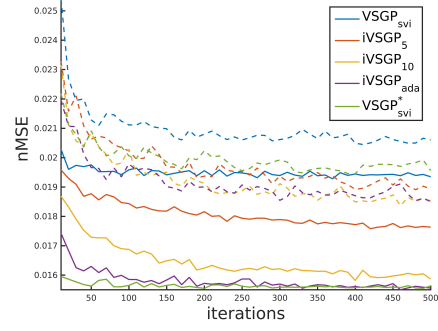

(b) joint 2

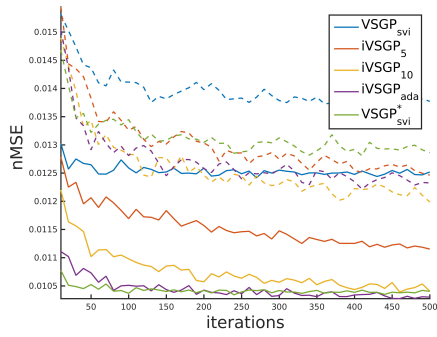

(c) joint 3

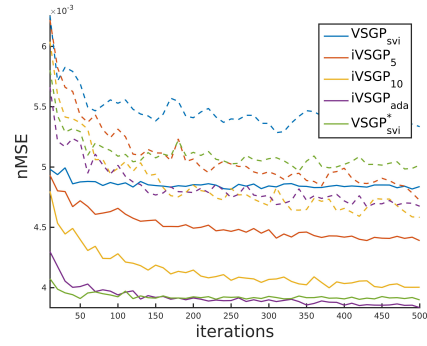

(d) joint 4

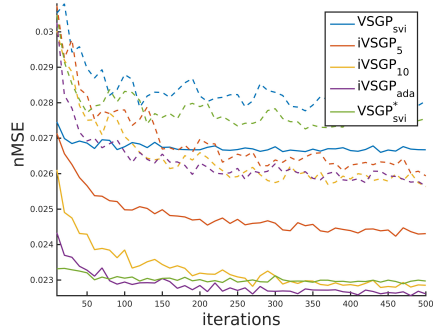

(e) joint 5

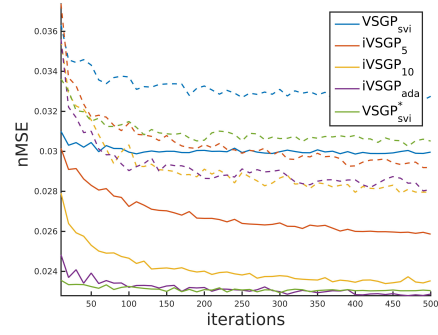

(f) joint 6

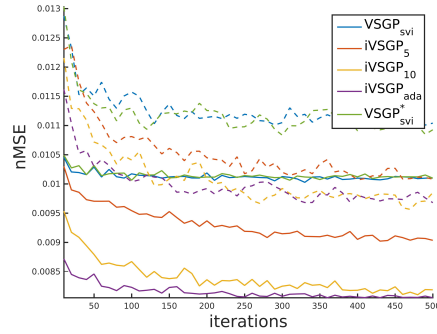

(g) joint 7

Figure 3: Online learning results of *sarcos*. nMSE evaluated on the held out test set; the dash lines and the solid lines denote the results with  $N_m = 512$  and  $N_m = 2048$ , respectively.

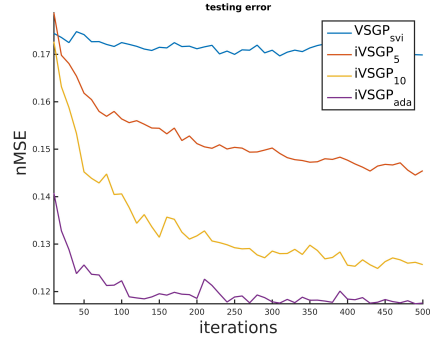

(a) joint 1

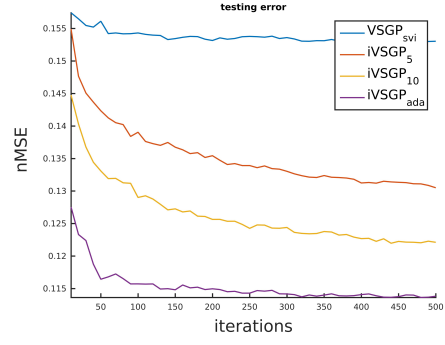

(b) joint 2

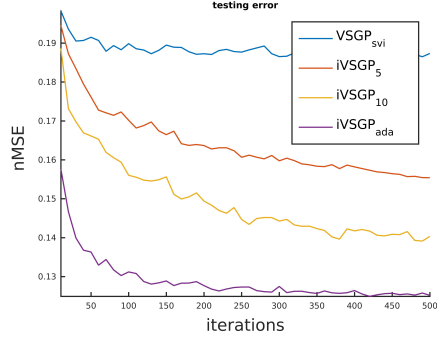

(c) joint 3

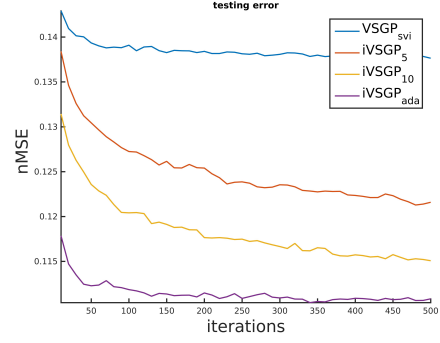

(d) joint 4

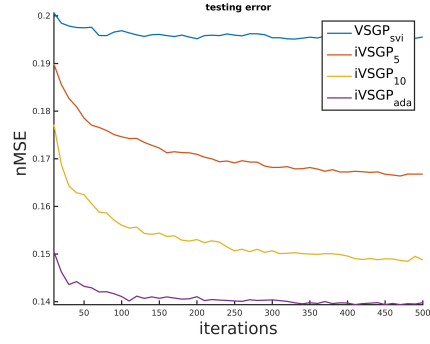

(e) joint 5

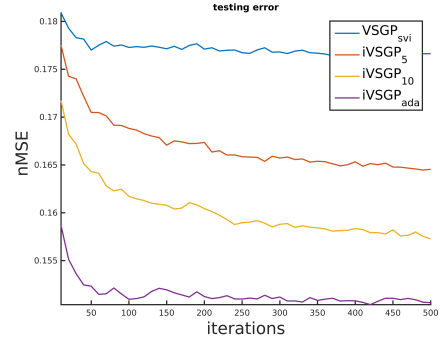

(f) joint 6

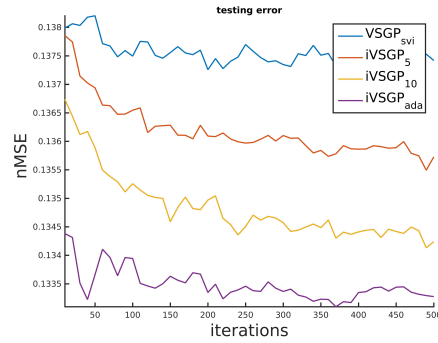

(g) joint 7

Figure 4: Online learning results of *KUKAI*. nMSE evaluated on the held out test set;  $N_m = 2048$

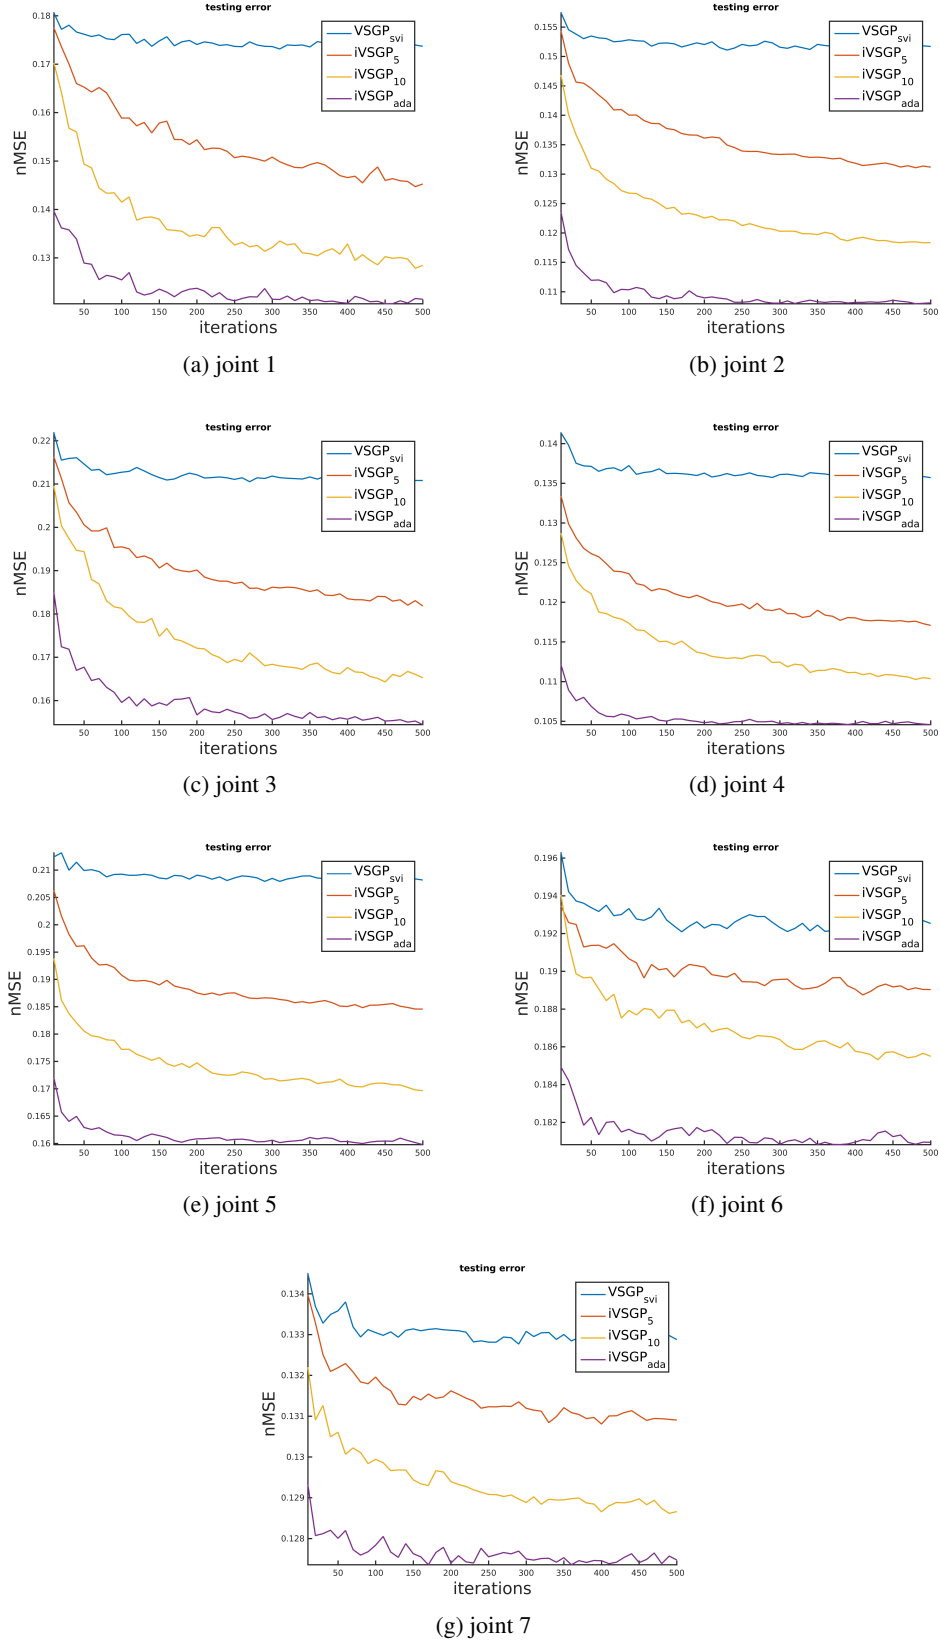

Figure 5: Online learning results of *KUKA2*. nMSE evaluated on the held out test set;  $N_m = 2048$
